# Supplementary material for: Exometabolite niche partitioning among sympatric soil bacteria
Source: PubMed Central journal article supplement (PMC4595634; doi:10.1038/ncomms9289), 2015-09-22
Supplement: ncomms9289-s1.pdf [file ncomms9289-s1.pdf]

**a**

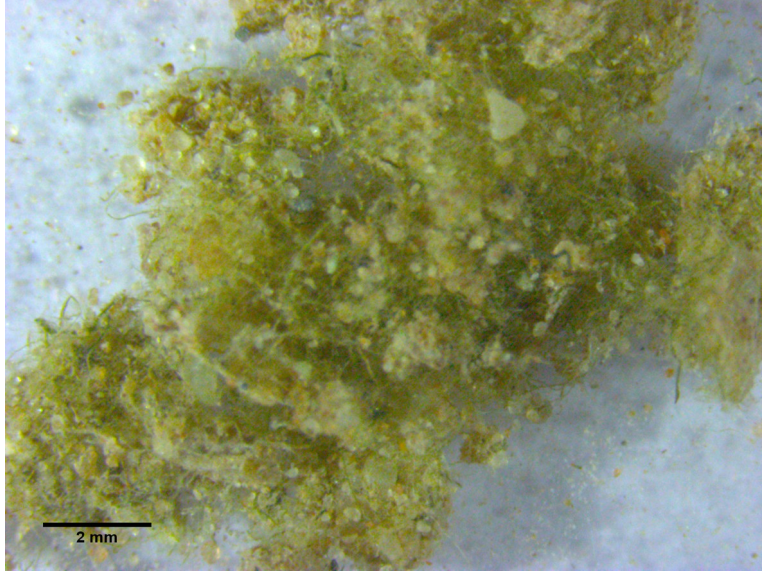

**b**

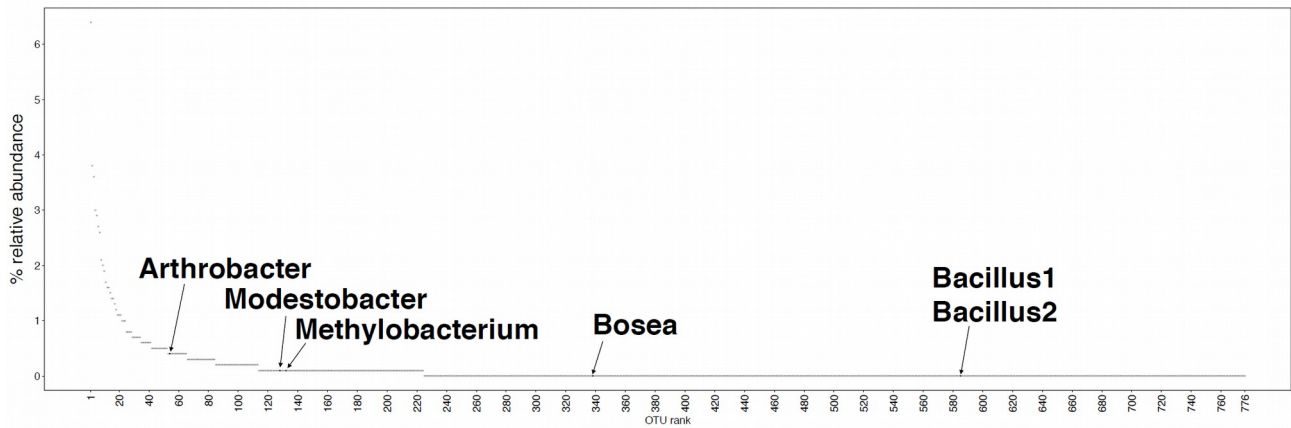

**c**

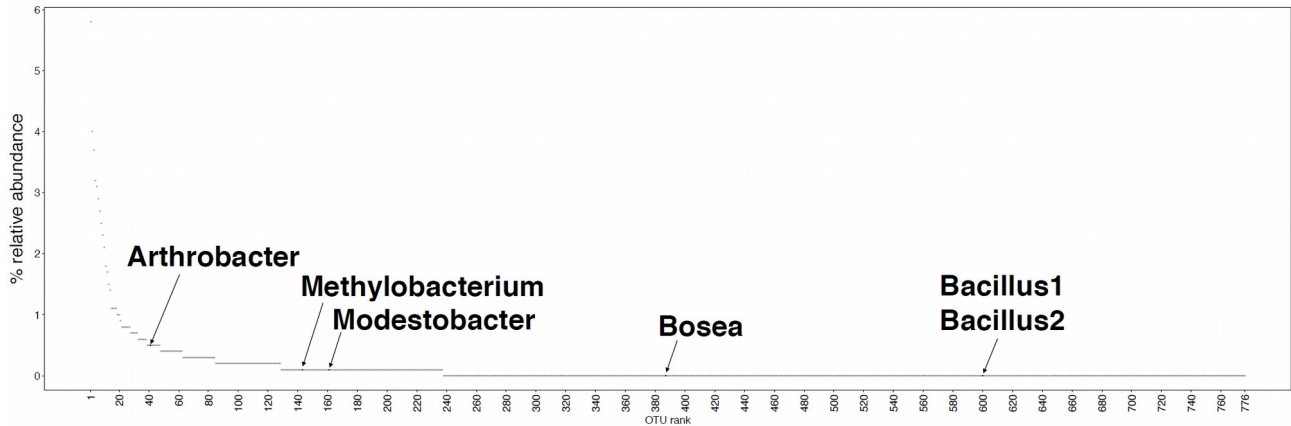

**Supplementary Figure 1 | Biocrust microbial communities.** (a) Photograph of an example of the cyanobacteria associated community [Image taken using Leica (Wetzlar, Germany) M165 FC dissection microscope complete with a Planapo 1.0x objective, DFC400 detector and KL 1500 LED light source]. Rank abundance curves for the community pre- (b) and post- (c) wetup. For each isolate, the closest OTU (with the highest percent identity) is marked.

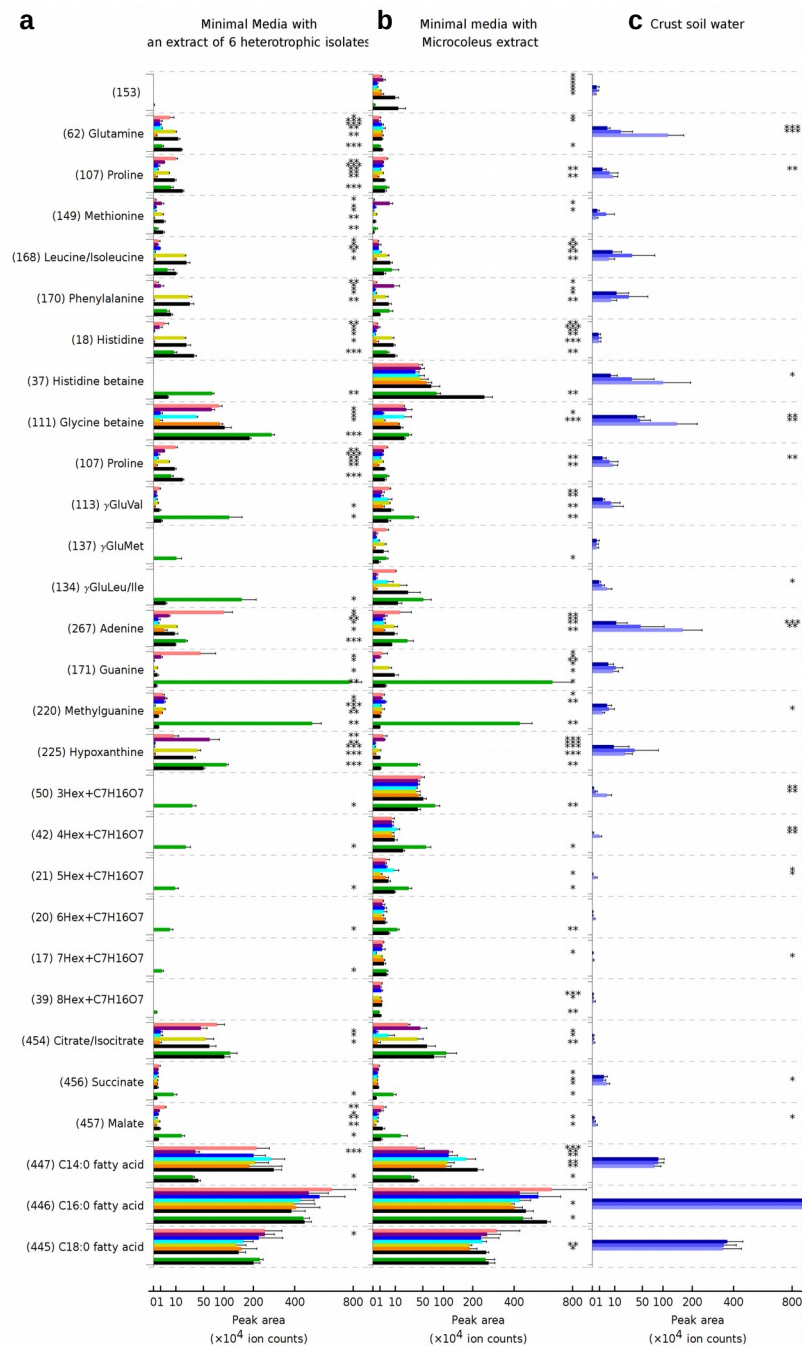

**Supplementary Figure 2 | Uptake and release of selected metabolites by biocrust isolates (a, b) and authentic biocrust (c).** Individual isolates were cultured in minimal media supplemented with a pooled metabolite extract of six heterotrophic isolates (a, Table 1) or metabolite extract of *Microcoleus vaginatus* PCC 9802 (b). (a, b) Levels of metabolites in spent media (colored bars) were compared to control media (no cells, black bars) to detect uptake or release of corresponding metabolites (n = 3). A separate set of control media (black bars next to green bars) were used for *Microcoleus* spent media as *Microcoleus* was cultured for a significantly longer time than the heterotrophs. (c) Levels of selected metabolites in crust soil water extracts (Supplementary Fig. 3) are also shown (n = 8). Error bars correspond to standard deviations. Stars correspond to Student's *t*-tests between spent media (colored bars) and the corresponding control media (black bars; \* –  $p < 0.05$ ; \*\* –  $p < 0.01$ ; \*\*\* –  $p < 0.001$ ). Figure 3 in the main text shows these comparisons for additional metabolites.

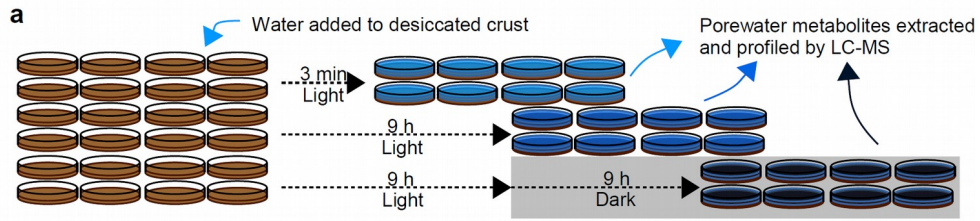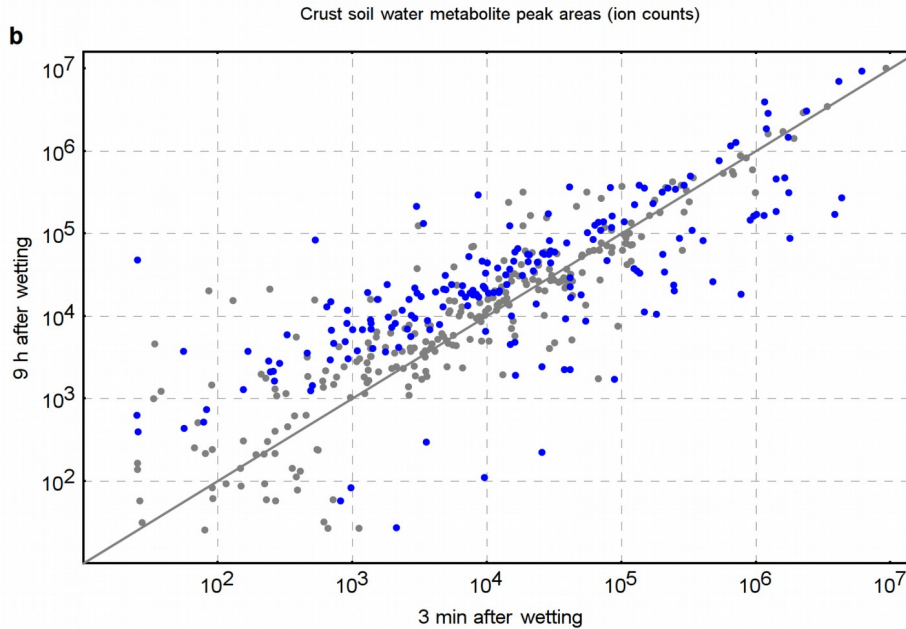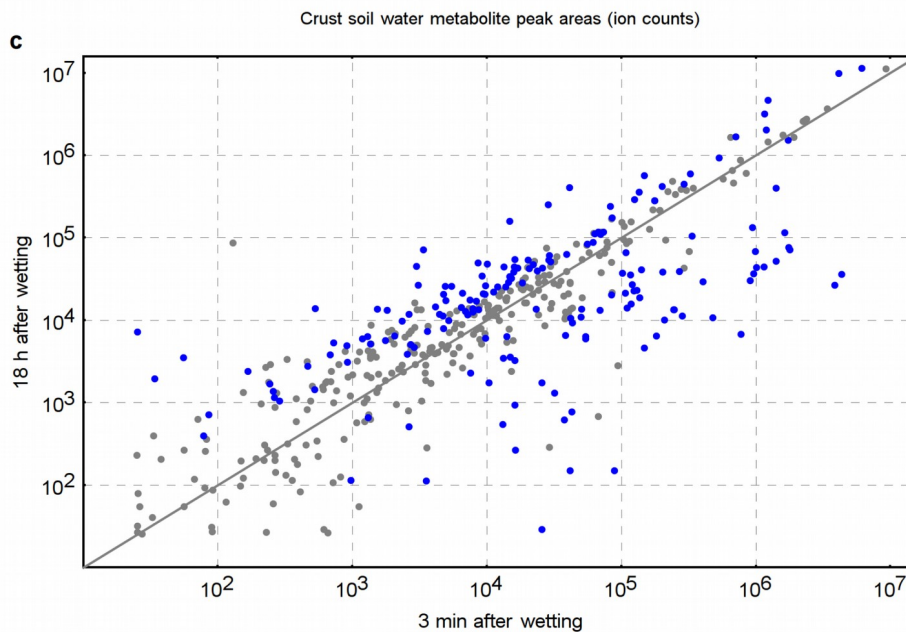

**Supplementary Figure 3 | Release and uptake of metabolites by biocrust following wetting.** (a) Water was added to desiccated biocrusts; and to simulate initial wetting, a light cycle, and a light-dark cycle, soil water metabolites were extracted 3 min, 9 h or 18 h respectively following wet-up. (b) Levels of metabolites shown in blue were significantly different ( $p < 0.05$ , Student's  $t$ -test) between 3 min soil water extracts and 18 h extracts showing initial release of metabolites into the soil water followed by uptake of a subset of the metabolites by biocrusts ( $n = 8$ ).

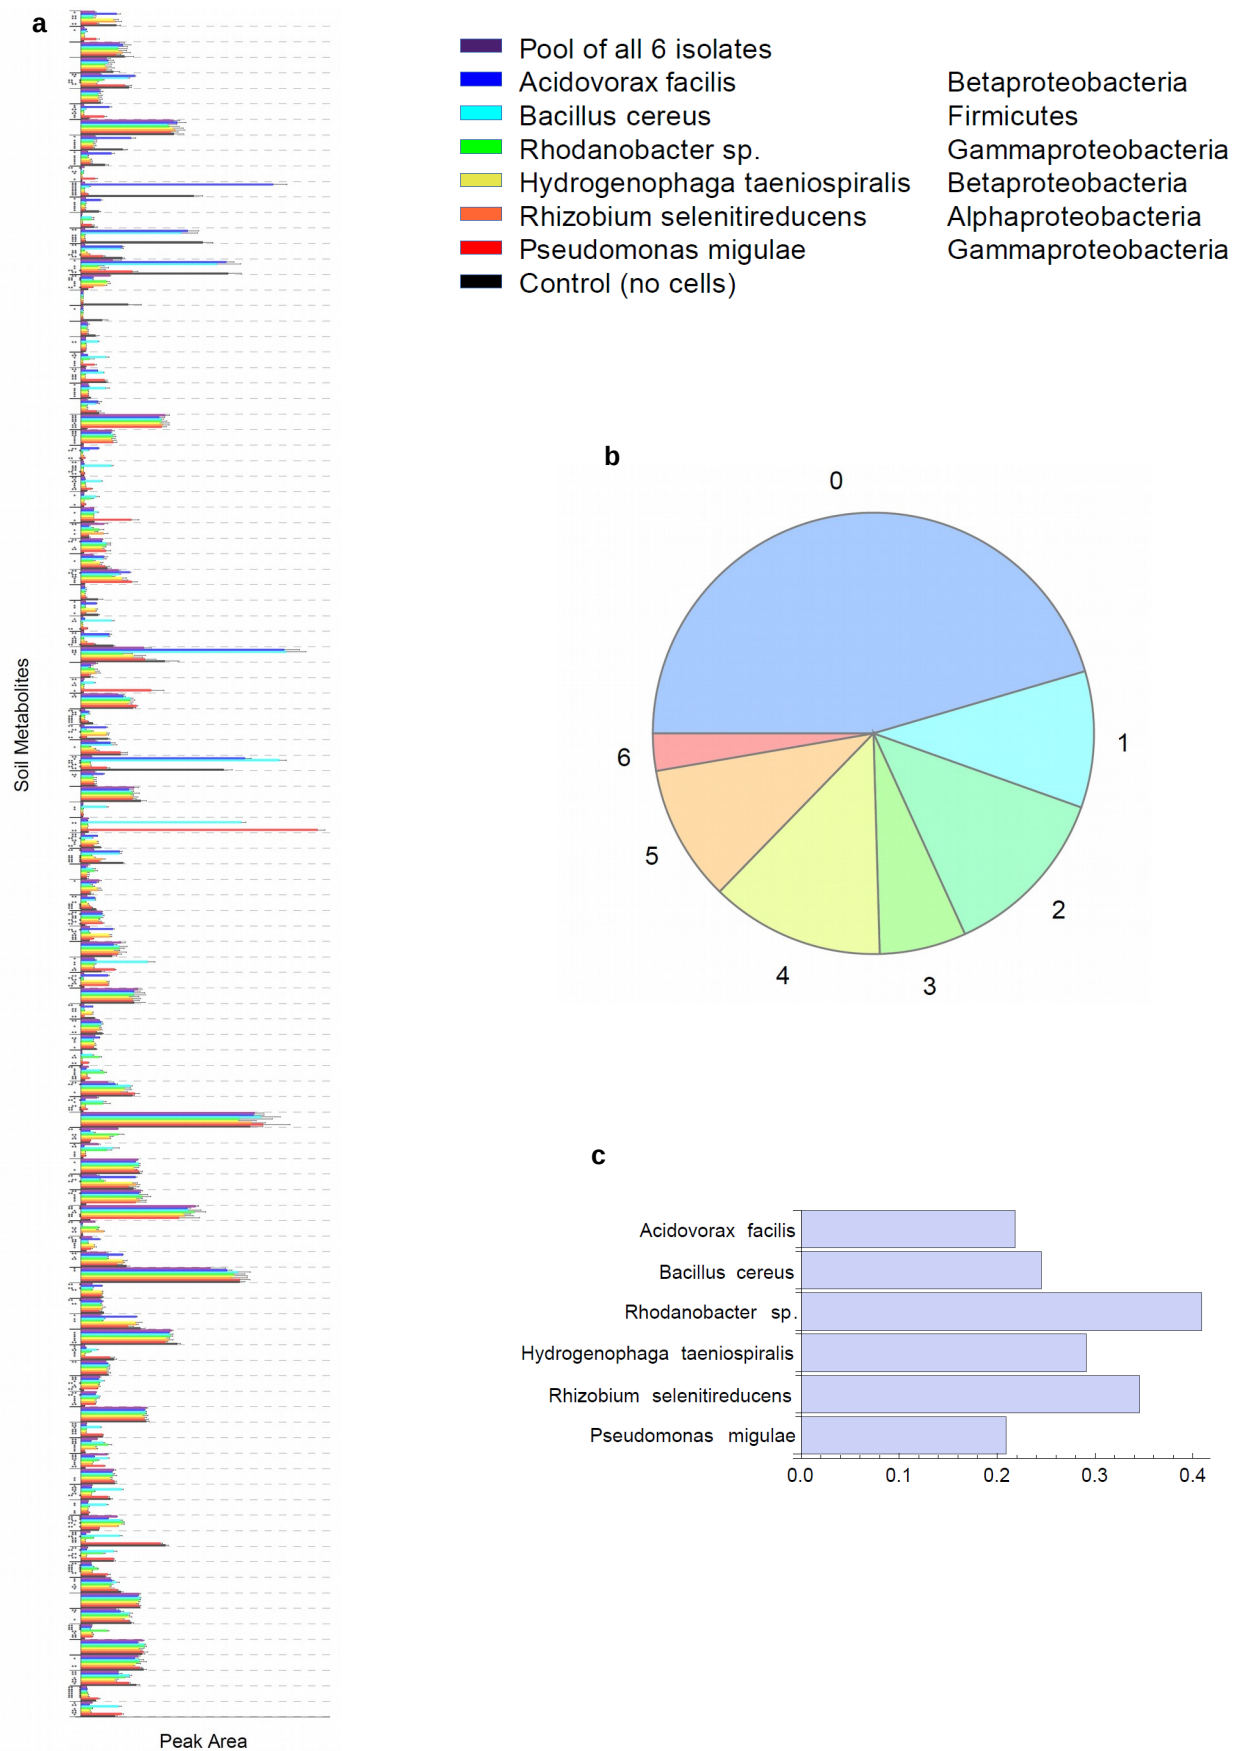

**Supplementary Figure 4 | Uptake and release of metabolites by mesophilic soil isolates (a).** Similar to biocrust isolates (Fig. 4), mesophilic soil isolates utilize only subsets of metabolites with limited overlap (b, c).

**Supplementary Table 1**

|                         | Most similar OTU | Percent Identity (V4) | Dry                                   |         | Wet                                   |         | OTU Taxonomic Classification                                                                                         |
|-------------------------|------------------|-----------------------|---------------------------------------|---------|---------------------------------------|---------|----------------------------------------------------------------------------------------------------------------------|
|                         |                  |                       | % relative abundance within non-Cyano | Rank    | % relative abundance within non-Cyano | Rank    |                                                                                                                      |
| <b>Methylobacterium</b> | <b>OTU_18</b>    | 98%                   | 0.1                                   | 132/776 | 0.1                                   | 143/776 | k__Bacteria; p__Proteobacteria; c__Alphaproteobacteria; o__Rhizobiales; f__Methylobacteriaceae; g__ ; s__            |
| <b>Arthrobacter</b>     | <b>OTU_44</b>    | 96%                   | 0.4                                   | 54/776  | 0.5                                   | 41/776  | k__Bacteria; p__Actinobacteria; c__Actinobacteria; o__Actinomycetales; f__Micrococcaceae; g__ ; s__                  |
| <b>Bacillus 1</b>       | <b>OTU_726</b>   | 95%                   | 0.0064                                | 585/776 | 0.0001                                | 600/776 | k__Bacteria; p__Firmicutes; c__Bacilli; o__Bacillales; f__Bacillaceae; g__Bacillus; s__                              |
| <b>Modestobacter</b>    | <b>OTU_434</b>   | 97%                   | 0.1                                   | 128/776 | 0.1                                   | 161/776 | k__Bacteria; p__Actinobacteria; c__Actinobacteria; o__Actinomycetales; f__Geodermatophilaceae; g__Modestobacter; s__ |
| <b>Bosea</b>            | <b>OTU_371</b>   | 93%                   | 0.022                                 | 338/776 | 0.0001                                | 387/776 | k__Bacteria; p__Proteobacteria; c__Alphaproteobacteria; o__Rhizobiales; f__Bradyrhizobiaceae; g__ ; s__              |
| <b>Bacillus 2</b>       | <b>OTU_726</b>   | 94%                   | 0.0064                                | 585/776 | 0.0001                                | 600/776 | k__Bacteria; p__Firmicutes; c__Bacilli; o__Bacillales; f__Bacillaceae; g__Bacillus; s__                              |
